# Supplementary material for: Native and engineered tropism of vectors derived from a rare species D adenovirus serotype 43
Source: PubMed Central journal article supplement (PMC5288196; doi:10.18632/oncotarget.10800), 2016-07-23
Supplement: oncotarget-07-53414-s001.pdf [file oncotarget-07-53414-s001.pdf]

## **Native and engineered tropism of vectors derived from a rare species D adenovirus serotype 43**

### **Supplementary Materials**

**Supplementary Table S1: Genes of Ad43.** See [Supplementary\\_Table\\_S1](#)

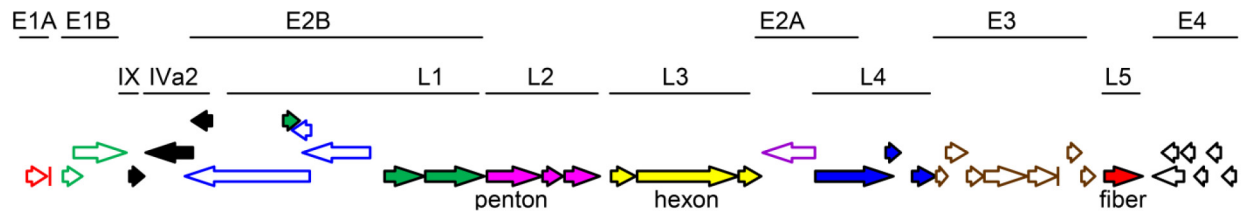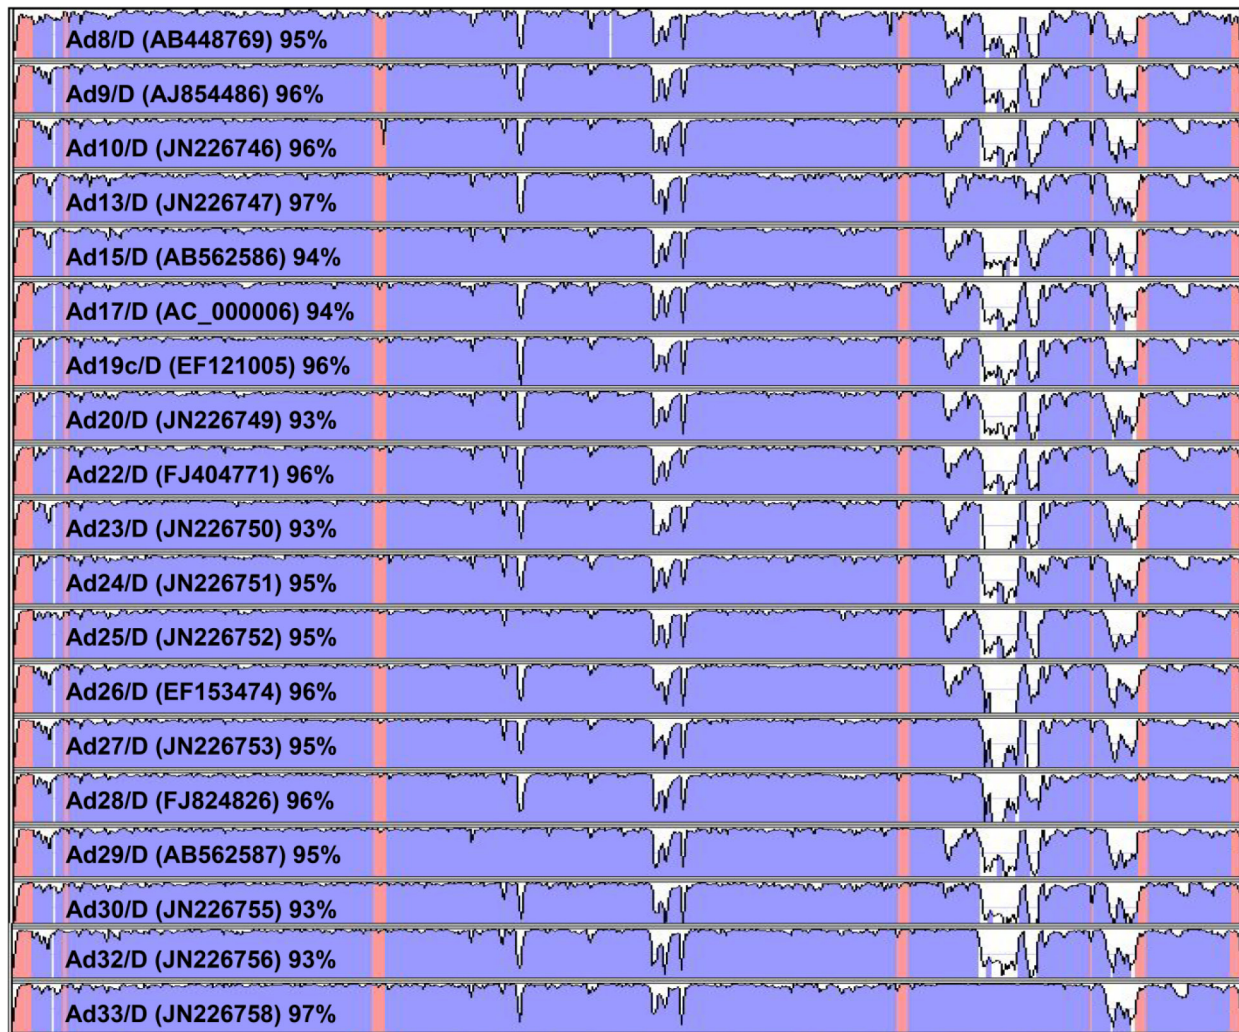

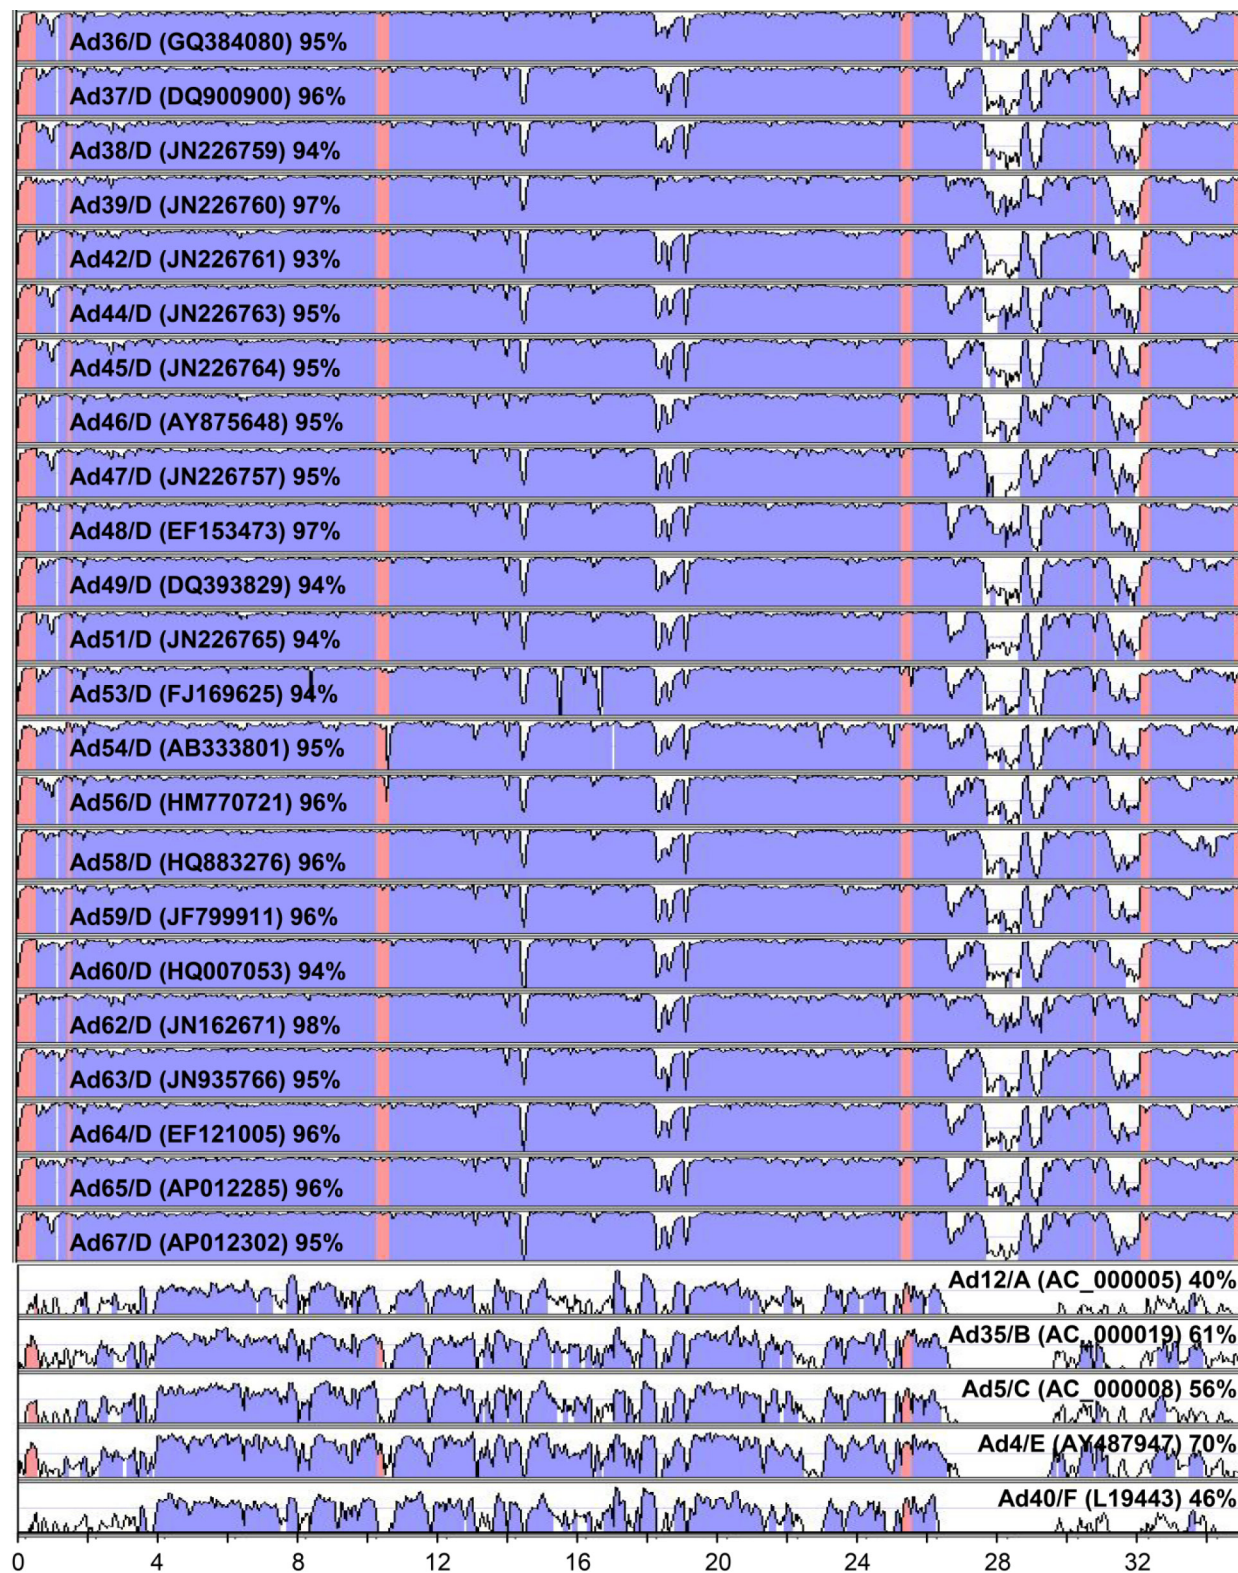

**Supplementary Figure S1: Comparison of Ad33 genome with the genomes of other species D Ads and representatives of species A, B, C, E and F.** The percent of sequence conservation at a given position (50% to 100% range) is shown by the height of the graph. The graphs show the coding and noncoding regions of the genomes in blue and pink, respectively. The genes within each region are shown in the same pattern/color. The major gene regions and genes of Ad33 are shown above the graphs. The numbers below the graphs show the genome coordinates in kilobase pairs. Each graph is identified by the Ad serotype, species, GenBank number, and percent of homology to Ad33. The Ad33 genome is 35,073 base pairs(bp)–long with the nucleotide composition of 22.5% A, 20.3% T, 28.6% C, and 28.6% G. The 57.2% GC content is in the 57%–59% range previously reported for other members of species D. The 5' and 3' ends are composed of 133 bp-long inverted terminal repeats (ITR). The Ad33 genome contains four early, two intermediate and five late transcription units, and includes 37 open reading frames (ORFs) and 5 hypothetical ORFs whose predicted products have no known analogues (Supplementary Table S1).
